# Supplementary material for: Epistatic SNP interaction of ERCC6 with ERCC8 and their joint protein expression contribute to gastric cancer/atrophic gastritis risk
Source: PubMed Central journal article supplement (PMC5522134; doi:10.18632/oncotarget.17814), 2017-05-11
Supplement: oncotarget-08-43140-s001.pdf [file oncotarget-08-43140-s001.pdf]

## Epistatic SNP interaction of *ERCC6* with *ERCC8* and their joint protein expression contribute to gastric cancer/atrophic gastritis risk

### SUPPLEMENTARY MATERIALS

### SUPPLEMENTARY TABLES

Supplementary Table 1: Effects of a single SNP on *ERCC6* and *ERCC8* expression

| SNP genotypes                                  |          | Positive (%) | <i>P</i> value |
|------------------------------------------------|----------|--------------|----------------|
| <b><i>ERCC6</i> SNP and protein expression</b> |          |              |                |
| rs1917799                                      | TT       | 44(83.0)     | ref.           |
|                                                | GT       | 41(95.3)     | 0.059          |
|                                                | GG       | 12(92.3)     | 0.403          |
|                                                | GT/GG:TT | 53(94.6)     | 0.053          |
|                                                | GG:GT/TT | 85(88.5)     | 0.684          |
| <b><i>ERCC8</i> SNP and protein expression</b> |          |              |                |
| rs158572                                       | AA       | 82(91.1)     | ref.           |
|                                                | GA       | 16(88.9)     | 0.767          |
|                                                | GG       | 1(100.0)     | 0.755          |
|                                                | GA/GG:AA | 17(89.5)     | 0.822          |
|                                                | GG:GA/AA | 98(90.7)     | 0.750          |
| rs158916                                       | TT       | 75(91.5)     | ref.           |
|                                                | CT       | 21(87.5)     | 0.559          |
|                                                | CC       | 3(100.0)     | 0.597          |
|                                                | CT/CC:TT | 24(88.9)     | 0.688          |
|                                                | CC:CT/TT | 96(90.0)     | 0.577          |

Supplementary Table 2: The three dimensions interactions of the *ERCC6* SNP-*ERCC8* SNP- *H. pylori* infection status with the risk of GC/CAG

| SNP genotypes                                                        |       |     | CAG vs. CSG                    |                 | GC vs. CSG                     |                 |
|----------------------------------------------------------------------|-------|-----|--------------------------------|-----------------|--------------------------------|-----------------|
|                                                                      |       |     | <i>P</i>                       | OR(95%CI)       | <i>P</i>                       | OR(95%CI)       |
| <b><i>ERCC6</i> rs1917799-<i>ERCC8</i> rs158572-<i>H. pylori</i></b> |       |     |                                |                 |                                |                 |
| TT                                                                   | AA    | (-) |                                | 1(ref)          |                                | 1(ref)          |
| TT                                                                   | AA    | (+) | <0.001                         | 5.32(3.51-8.05) | <0.001                         | 4.99(3.01-8.08) |
| TT                                                                   | AG+GG | (-) | 0.319                          | 1.41(0.72-2.74) | 0.046                          | 2.16(1.01-4.61) |
| TT                                                                   | AG+GG | (+) | <0.001                         | 7.74(2.80-21.4) | <0.001                         | 12.5(3.99-39.2) |
| GTGG                                                                 | AA    | (-) | 0.507                          | 0.90(0.65-1.23) | 0.090                          | 1.39(0.95-2.04) |
| GTGG                                                                 | AA    | (+) | <0.001                         | 5.14(3.62-7.30) | <0.001                         | 5.49(3.58-8.40) |
| GTGG                                                                 | AG+GG | (-) | 0.058                          | 0.58(0.33-1.02) | 0.147                          | 1.54(0.86-2.74) |
| GTGG                                                                 | AG+GG | (+) | 0.001                          | 2.74(1.52-4.94) | <0.001                         | 3.83(1.96-7.47) |
|                                                                      |       |     | $P_{\text{interaction}}=0.771$ |                 | $P_{\text{interaction}}=0.466$ |                 |
|                                                                      |       |     | interaction index=0.80         |                 | interaction index=0.55         |                 |
| <b><i>ERCC6</i> rs1917799-<i>ERCC8</i> rs158916-<i>H. pylori</i></b> |       |     |                                |                 |                                |                 |
| TT                                                                   | TT    | (-) |                                | 1(ref)          |                                | 1(ref)          |
| TT                                                                   | TT    | (+) | <0.001                         | 5.52(3.53-8.64) | <0.001                         | 5.40(3.12-9.35) |
| TT                                                                   | CT+CC | (-) | 0.812                          | 1.07(0.62-1.86) | 0.266                          | 1.44(0.86-2.72) |
| TT                                                                   | CT+CC | (+) | <0.001                         | 4.94(2.51-9.72) | <0.001                         | 5.62(2.58-12.2) |
| GTGG                                                                 | TT    | (-) | 0.491                          | 0.89(0.64-1.24) | 0.041                          | 1.52(1.02-2.28) |
| GTGG                                                                 | TT    | (+) | <0.001                         | 4.66(3.23-6.71) | <0.001                         | 5.39(3.45-8.41) |
| GTGG                                                                 | CT+CC | (-) | 0.038                          | 0.59(0.36-0.97) | 0.909                          | 0.97(0.56-1.68) |
| GTGG                                                                 | CT+CC | (+) | <0.001                         | 4.01(2.36-6.79) | <0.001                         | 3.82(2.01-7.25) |
|                                                                      |       |     | $P_{\text{interaction}}=0.459$ |                 | $P_{\text{interaction}}=0.517$ |                 |
|                                                                      |       |     | interaction index=1.54         |                 | interaction index=1.54         |                 |

CSG: chronic superficial gastritis; CAG: chronic atrophic gastritis; GC: gastric cancer.
